# Supplementary material for: The current state of carnivore cognition
Source: Springer Nature journal article supplement (doi:10.1007/s10071-022-01709-2), 2022-11-04
Supplement: 10071_2022_1709_MOESM2_ESM.xlsx [file 10071_2022_1709_MOESM2_ESM.xlsx]

## Sheet: Sheet1
Query	Source	Papers	Citations	QueryDate	year_first	year_last
mammal OR bird OR mammalian OR aves OR avian OR primate OR ape OR carnivora AND "animal cognition" OR "animal memory" OR "animal learning" OR "animal intelligence" OR "theory of mind in animals" OR "intelligence in animals" OR "cognition in animals" OR...	Google Scholar	957	145535	2022-09-14 17:59:11	2005	2005
mammal OR mammalia OR aves OR bird OR birds OR avian AND "animal cognition" OR "animal memory" OR "animal learning" OR "animal intelligence" OR "theory of mind in animals" OR "intelligence in animals" OR "cognition in animals" OR "animal innovation" OR...	Google Scholar	989	85196	2022-09-24 12:54:03	1873	2007
mammal OR mammalia OR aves OR bird OR birds OR avian AND "animal cognition" OR "animal memory" OR "animal learning" OR "animal intelligence" OR "theory of mind in animals" OR "intelligence in animals" OR "cognition in animals" OR "animal innovation" OR...	Google Scholar	990	130678	2022-09-24 16:18:40	2009	2009
mammal OR bird OR mammalian OR aves OR avian OR primate OR ape OR carnivora AND "animal cognition" OR "animal memory" OR "animal learning" OR "animal intelligence" OR "theory of mind in animals" OR "intelligence in animals" OR "cognition in animals" OR...	Google Scholar	767	90918	2022-09-14 16:08:51	2004	2004
mammal OR mammalia OR ape AND "animal cognition" OR "animal memory" OR "animal learning" OR "animal intelligence" OR "theory of mind in animals" OR "intelligence in animals" OR "cognition in animals" OR "animal innovation" OR "innovation in animals" OR...	Google Scholar	854	67452	2022-09-18 12:58:20	2007	2007
mammal OR mammalia OR ape AND "animal cognition" OR "animal memory" OR "animal learning" OR "animal intelligence" OR "theory of mind in animals" OR "intelligence in animals" OR "cognition in animals" OR "animal innovation" OR "innovation in animals" OR...	Google Scholar	943	89869	2022-09-18 16:51:00	2009	2009
mammal OR mammalia OR ape AND "animal cognition" OR "animal memory" OR "animal learning" OR "animal intelligence" OR "theory of mind in animals" OR "intelligence in animals" OR "cognition in animals" OR "animal innovation" OR "innovation in animals" OR...	Google Scholar	990	80279	2022-09-18 19:29:33	2010	2010
aves OR bird OR birds OR avian AND "animal cognition" OR "animal memory" OR "animal learning" OR "animal intelligence" OR "theory of mind in animals" OR "intelligence in animals" OR "cognition in animals" OR "animal innovation" OR "innovation in animal...	Google Scholar	989	63427	2022-09-24 18:37:51	2010	2010
mammal OR bird OR mammalian OR aves OR avian OR primate OR ape OR carnivora AND "animal cognition" OR "animal memory" OR "animal learning" OR "animal intelligence" OR "theory of mind in animals" OR "intelligence in animals" OR "cognition in animals" OR...	Google Scholar	891	75897	2022-09-14 13:50:34	2003	2003
mammal OR mammalia OR aves OR bird OR birds OR avian AND "animal cognition" OR "animal memory" OR "animal learning" OR "animal intelligence" OR "theory of mind in animals" OR "intelligence in animals" OR "cognition in animals" OR "animal innovation" OR...	Google Scholar	992	68482	2022-09-24 14:36:56	2008	2008
mammal OR mammalia OR lemur AND "animal cognition" OR "animal memory" OR "animal learning" OR "animal intelligence" OR "theory of mind in animals" OR "intelligence in animals" OR "cognition in animals" OR "animal innovation" OR "innovation in animals" ...	Google Scholar	936	65744	2022-09-21 18:28:02	2008	2009
mammal OR mammalian OR carnivora AND "animal cognition" OR "animal memory" OR "animal learning" OR "animal intelligence" OR "theory of mind in animals" OR "intelligence in animals" OR "cognition in animals" OR "animal innovation" OR "innovation in ani...	Google Scholar	646	77774	2022-09-15 11:10:30	1995	2006
mammal OR mammalian OR carnivora AND "animal cognition" OR "animal memory" OR "animal learning" OR "animal intelligence" OR "theory of mind in animals" OR "intelligence in animals" OR "cognition in animals" OR "animal innovation" OR "innovation in ani...	Google Scholar	739	67505	2022-09-15 12:30:08	2000	2007
mammal OR bird OR mammalian OR aves OR avian OR primate OR ape OR carnivora AND "animal cognition" OR "animal memory" OR "animal learning" OR "animal intelligence" OR "theory of mind in animals" OR "intelligence in animals" OR "cognition in animals" OR...	Google Scholar	806	87184	2022-09-13 14:57:57	1995	1996
aves OR bird OR birds OR avian AND "animal cognition" OR "animal memory" OR "animal learning" OR "animal intelligence" OR "theory of mind in animals" OR "intelligence in animals" OR "cognition in animals" OR "animal innovation" OR "innovation in animal...	Google Scholar	985	65381	2022-09-24 20:29:41	2011	2011
mammal OR mammalia OR lemur AND "animal cognition" OR "animal memory" OR "animal learning" OR "animal intelligence" OR "theory of mind in animals" OR "intelligence in animals" OR "cognition in animals" OR "animal innovation" OR "innovation in animals" ...	Google Scholar	990	67865	2022-09-21 21:12:51	2010	2011
mammal OR mammalia OR carnivora AND "animal cognition" OR "animal memory" OR "animal learning" OR "animal intelligence" OR "theory of mind in animals" OR "intelligence in animals" OR "cognition in animals" OR "animal innovation" OR "innovation in anima...	Google Scholar	829	60220	2022-09-15 16:12:04	2008	2009
"primates cognition" OR "primates memory" OR "memory in primates" OR "learning in primates" OR "innovation in primates" OR "primates innovation" OR "problem solving in primates" from 2001 to 2010, no citations, no patents	Google Scholar	617	62042	2022-09-30 09:19:26	2001	2010
mammal OR bird OR mammalian OR aves OR avian OR primate OR ape OR carnivora AND "animal cognition" OR "animal memory" OR "animal learning" OR "animal intelligence" OR "theory of mind in animals" OR "intelligence in animals" OR "cognition in animals" OR...	Google Scholar	668	66835	2022-09-13 22:26:09	2001	2001
mammal OR bird OR mammalian OR aves OR avian OR primate OR ape OR carnivora AND "animal cognition" OR "animal memory" OR "animal learning" OR "animal intelligence" OR "theory of mind in animals" OR "intelligence in animals" OR "cognition in animals" OR...	Google Scholar	755	82895	2022-09-14 11:54:30	2002	2002
mammal OR bird OR mammalian OR aves OR avian OR primate OR ape OR carnivora AND "animal cognition" OR "animal memory" OR "animal learning" OR "animal intelligence" OR "theory of mind in animals" OR "intelligence in animals" OR "cognition in animals" OR...	Google Scholar	921	65197	2022-09-12 13:41:09	1984	1986
mammal OR mammalia OR ape AND "animal cognition" OR "animal memory" OR "animal learning" OR "animal intelligence" OR "theory of mind in animals" OR "intelligence in animals" OR "cognition in animals" OR "animal innovation" OR "innovation in animals" OR...	Google Scholar	667	55622	2022-09-18 11:14:24	1995	2006
mammal OR bird OR mammalian OR aves OR avian OR primate OR ape OR carnivora AND "animal cognition" OR "animal memory" OR "animal learning" OR "animal intelligence" OR "theory of mind in animals" OR "intelligence in animals" OR "cognition in animals" OR...	Google Scholar	811	66559	2022-09-13 12:10:49	1993	1994
mammal OR bird OR mammalian OR aves OR avian OR primate OR ape OR carnivora AND "animal cognition" OR "animal memory" OR "animal learning" OR "animal intelligence" OR "theory of mind in animals" OR "intelligence in animals" OR "cognition in animals" OR...	Google Scholar	644	68597	2022-09-13 21:17:56	2000	2000
mammal OR mammalia OR ape AND "animal cognition" OR "animal memory" OR "animal learning" OR "animal intelligence" OR "theory of mind in animals" OR "intelligence in animals" OR "cognition in animals" OR "animal innovation" OR "innovation in animals" OR...	Google Scholar	792	45747	2022-09-18 14:48:06	2008	2008
mammal OR bird OR mammalian OR aves OR avian OR primate OR ape OR carnivora AND "animal cognition" OR "animal memory" OR "animal learning" OR "animal intelligence" OR "theory of mind in animals" OR "intelligence in animals" OR "cognition in animals" OR...	Google Scholar	904	194893	2022-09-11 23:11:08	1976	1980
mammal OR mammalia OR ape AND "animal cognition" OR "animal memory" OR "animal learning" OR "animal intelligence" OR "theory of mind in animals" OR "intelligence in animals" OR "cognition in animals" OR "animal innovation" OR "innovation in animals" OR...	Google Scholar	986	57268	2022-09-19 00:15:26	2011	2011
mammal OR bird OR mammalian OR aves OR avian OR primate OR ape OR carnivora AND "animal cognition" OR "animal memory" OR "animal learning" OR "animal intelligence" OR "theory of mind in animals" OR "intelligence in animals" OR "cognition in animals" OR...	Google Scholar	527	54147	2022-09-13 19:14:42	1999	1999
aves OR bird OR birds OR avian AND "animal cognition" OR "animal memory" OR "animal learning" OR "animal intelligence" OR "theory of mind in animals" OR "intelligence in animals" OR "cognition in animals" OR "animal innovation" OR "innovation in animal...	Google Scholar	992	52357	2022-09-24 22:19:21	2012	2012
aves OR bird OR birds OR avian AND "animal cognition" OR "animal memory" OR "animal learning" OR "animal intelligence" OR "theory of mind in animals" OR "intelligence in animals" OR "cognition in animals" OR "animal innovation" OR "innovation in animal...	Google Scholar	997	56783	2022-09-25 00:35:29	2013	2013
mammal OR mammalia OR ape AND "animal cognition" OR "animal memory" OR "animal learning" OR "animal intelligence" OR "theory of mind in animals" OR "intelligence in animals" OR "cognition in animals" OR "animal innovation" OR "innovation in animals" OR...	Google Scholar	992	47251	2022-09-19 13:32:15	2013	2013
mammal OR bird OR mammalian OR aves OR avian OR primate OR ape OR carnivora AND "animal cognition" OR "animal memory" OR "animal learning" OR "animal intelligence" OR "theory of mind in animals" OR "intelligence in animals" OR "cognition in animals" OR...	Google Scholar	712	58441	2022-09-13 00:05:27	1991	1992
mammal OR mammalia OR ape AND "animal cognition" OR "animal memory" OR "animal learning" OR "animal intelligence" OR "theory of mind in animals" OR "intelligence in animals" OR "cognition in animals" OR "animal innovation" OR "innovation in animals" OR...	Google Scholar	985	52960	2022-09-19 10:53:39	2011	2012
"primates cognition" OR "primates memory" OR "memory in primates" OR "learning in primates" OR "innovation in primates" OR "primates innovation" OR "problem solving in primates" from 2011 to 2015, no citations, no patents	Google Scholar	654	42799	2022-09-30 11:18:07	2011	2015
mammal OR bird OR mammalian OR aves OR avian OR primate OR ape OR carnivora AND "animal cognition" OR "animal memory" OR "animal learning" OR "animal intelligence" OR "theory of mind in animals" OR "intelligence in animals" OR "cognition in animals" OR...	Google Scholar	597	84904	2022-09-13 18:20:52	1998	1998
"primates cognition" OR "primates memory" OR "memory in primates" OR "learning in primates" OR "innovation in primates" OR "primates innovation" OR "problem solving in primates" from 1800 to 2000, no citations, no patents	Google Scholar	428	47711	2022-09-29 18:07:50	1902	2000
mammal OR mammalia OR carnivora AND "animal cognition" OR "animal memory" OR "animal learning" OR "animal intelligence" OR "theory of mind in animals" OR "intelligence in animals" OR "cognition in animals" OR "animal innovation" OR "innovation in anima...	Google Scholar	555	41531	2022-09-15 19:32:15	2010	2010
aves OR bird OR birds OR avian AND "animal cognition" OR "animal memory" OR "animal learning" OR "animal intelligence" OR "theory of mind in animals" OR "intelligence in animals" OR "cognition in animals" OR "animal innovation" OR "innovation in animal...	Google Scholar	999	48910	2022-09-25 13:02:52	2015	2015
mammal OR mammalia OR lemur AND "animal cognition" OR "animal memory" OR "animal learning" OR "animal intelligence" OR "theory of mind in animals" OR "intelligence in animals" OR "cognition in animals" OR "animal innovation" OR "innovation in animals" ...	Google Scholar	789	47681	2022-09-22 09:31:17	2013	2013
aves OR bird OR birds OR avian AND "animal cognition" OR "animal memory" OR "animal learning" OR "animal intelligence" OR "theory of mind in animals" OR "intelligence in animals" OR "cognition in animals" OR "animal innovation" OR "innovation in animal...	Google Scholar	995	53404	2022-09-25 11:14:24	2014	2014
mammal OR bird OR mammalian OR aves OR avian OR primate OR ape OR carnivora AND "animal cognition" OR "animal memory" OR "animal learning" OR "animal intelligence" OR "theory of mind in animals" OR "intelligence in animals" OR "cognition in animals" OR...	Google Scholar	458	56468	2022-09-13 17:02:20	1997	1997
mammal OR mammalia OR carnivora AND "animal cognition" OR "animal memory" OR "animal learning" OR "animal intelligence" OR "theory of mind in animals" OR "intelligence in animals" OR "cognition in animals" OR "animal innovation" OR "innovation in anima...	Google Scholar	710	37212	2022-09-15 23:41:01	2013	2013
mammal OR mammalia OR lemur AND "animal cognition" OR "animal memory" OR "animal learning" OR "animal intelligence" OR "theory of mind in animals" OR "intelligence in animals" OR "cognition in animals" OR "animal innovation" OR "innovation in animals" ...	Google Scholar	445	34663	2022-09-21 16:26:55	2007	2007
mammal OR mammalia OR lemur AND "animal cognition" OR "animal memory" OR "animal learning" OR "animal intelligence" OR "theory of mind in animals" OR "intelligence in animals" OR "cognition in animals" OR "animal innovation" OR "innovation in animals" ...	Google Scholar	699	39277	2022-09-22 00:00:20	2012	2012
"cat cognition" OR "cat memory" OR "memory in cats" OR "learning in cats" OR "innovation in cats" OR "cat innovation" OR "problem solving in cats" from 1950 to 1999, no citations, no patents	Google Scholar	658	42760	2022-09-28 16:12:23	1950	1999
mammal OR bird OR mammalian OR aves OR avian OR primate OR ape OR carnivora AND "animal cognition" OR "animal memory" OR "animal learning" OR "animal intelligence" OR "theory of mind in animals" OR "intelligence in animals" OR "cognition in animals" OR...	Google Scholar	750	54747	2022-09-12 11:53:03	1981	1983
mammal OR mammalia OR carnivora AND "animal cognition" OR "animal memory" OR "animal learning" OR "animal intelligence" OR "theory of mind in animals" OR "intelligence in animals" OR "cognition in animals" OR "animal innovation" OR "innovation in anima...	Google Scholar	628	36494	2022-09-15 21:51:41	2012	2012
mammal OR mammalia OR carnivora AND "animal cognition" OR "animal memory" OR "animal learning" OR "animal intelligence" OR "theory of mind in animals" OR "intelligence in animals" OR "cognition in animals" OR "animal innovation" OR "innovation in anima...	Google Scholar	552	37593	2022-09-15 20:45:32	2011	2011
mammal OR mammalia OR ape AND "animal cognition" OR "animal memory" OR "animal learning" OR "animal intelligence" OR "theory of mind in animals" OR "intelligence in animals" OR "cognition in animals" OR "animal innovation" OR "innovation in animals" OR...	Google Scholar	987	39477	2022-09-19 16:29:23	2014	2014
aves OR bird OR birds OR avian AND "animal cognition" OR "animal memory" OR "animal learning" OR "animal intelligence" OR "theory of mind in animals" OR "intelligence in animals" OR "cognition in animals" OR "animal innovation" OR "innovation in animal...	Google Scholar	996	38931	2022-09-25 14:54:04	2016	2016
mammal OR mammalia OR lemur AND "animal cognition" OR "animal memory" OR "animal learning" OR "animal intelligence" OR "theory of mind in animals" OR "intelligence in animals" OR "cognition in animals" OR "animal innovation" OR "innovation in animals" ...	Google Scholar	773	32916	2022-09-22 13:06:18	2014	2014
mammal OR bird OR mammalian OR aves OR avian OR primate OR ape OR carnivora AND "animal cognition" OR "animal memory" OR "animal learning" OR "animal intelligence" OR "theory of mind in animals" OR "intelligence in animals" OR "cognition in animals" OR...	Google Scholar	637	37152	2022-09-10 22:15:28	1901	1950
mammal OR mammalia OR ape AND "animal cognition" OR "animal memory" OR "animal learning" OR "animal intelligence" OR "theory of mind in animals" OR "intelligence in animals" OR "cognition in animals" OR "animal innovation" OR "innovation in animals" OR...	Google Scholar	981	30118	2022-09-19 18:16:55	2013	2015
mammal OR mammalia OR lemur AND "animal cognition" OR "animal memory" OR "animal learning" OR "animal intelligence" OR "theory of mind in animals" OR "intelligence in animals" OR "cognition in animals" OR "animal innovation" OR "innovation in animals" ...	Google Scholar	355	32733	2022-09-21 15:38:31	1995	2006
mammal OR bird OR mammalian OR aves OR avian OR primate OR ape OR carnivora AND "animal cognition" OR "animal memory" OR "animal learning" OR "animal intelligence" OR "theory of mind in animals" OR "intelligence in animals" OR "cognition in animals" OR...	Google Scholar	463	41428	2022-09-11 20:56:01	1951	1970
mammal OR bird OR mammalian OR aves OR avian OR primate OR ape OR carnivora AND "animal cognition" OR "animal memory" OR "animal learning" OR "animal intelligence" OR "theory of mind in animals" OR "intelligence in animals" OR "cognition in animals" OR...	Google Scholar	396	64806	2022-09-12 20:59:39	1990	1990
mammal OR mammalia OR carnivora AND "animal cognition" OR "animal memory" OR "animal learning" OR "animal intelligence" OR "theory of mind in animals" OR "intelligence in animals" OR "cognition in animals" OR "animal innovation" OR "innovation in anima...	Google Scholar	740	29370	2022-09-16 12:40:44	2014	2014
aves OR bird OR birds OR avian AND "animal cognition" OR "animal memory" OR "animal learning" OR "animal intelligence" OR "theory of mind in animals" OR "intelligence in animals" OR "cognition in animals" OR "animal innovation" OR "innovation in animal...	Google Scholar	999	28991	2022-09-25 18:51:53	2017	2017
"dog cognition" OR "dog memory" OR "memory in dogs" OR "learning in dogs" OR "innovation in dogs" OR "dog innovation" OR "problem solving in dogs" from 2001 to 2010, no citations, no patents	Google Scholar	322	40023	2022-09-28 19:52:40	2001	2010
mammal OR mammalia OR ape AND "animal cognition" OR "animal memory" OR "animal learning" OR "animal intelligence" OR "theory of mind in animals" OR "intelligence in animals" OR "cognition in animals" OR "animal innovation" OR "innovation in animals" OR...	Google Scholar	987	31030	2022-09-20 10:20:34	2017	2017
mammal OR mammalia OR lemur AND "animal cognition" OR "animal memory" OR "animal learning" OR "animal intelligence" OR "theory of mind in animals" OR "intelligence in animals" OR "cognition in animals" OR "animal innovation" OR "innovation in animals" ...	Google Scholar	729	29815	2022-09-22 15:17:25	2015	2015
mammal OR mammalia OR carnivora AND "animal cognition" OR "animal memory" OR "animal learning" OR "animal intelligence" OR "theory of mind in animals" OR "intelligence in animals" OR "cognition in animals" OR "animal innovation" OR "innovation in anima...	Google Scholar	669	19099	2022-09-16 17:25:55	2015	2015
mammal OR bird OR mammalian OR aves OR avian OR primate OR ape OR carnivora AND "animal cognition" OR "animal memory" OR "animal learning" OR "animal intelligence" OR "theory of mind in animals" OR "intelligence in animals" OR "cognition in animals" OR...	Google Scholar	293	37567	2022-09-12 20:09:22	1989	1989
mammal OR mammalia OR lemur AND "animal cognition" OR "animal memory" OR "animal learning" OR "animal intelligence" OR "theory of mind in animals" OR "intelligence in animals" OR "cognition in animals" OR "animal innovation" OR "innovation in animals" ...	Google Scholar	943	24749	2022-09-22 17:31:54	1973	2016
aves OR bird OR birds OR avian AND "animal cognition" OR "animal memory" OR "animal learning" OR "animal intelligence" OR "theory of mind in animals" OR "intelligence in animals" OR "cognition in animals" OR "animal innovation" OR "innovation in animal...	Google Scholar	994	26339	2022-09-25 21:15:10	2018	2018
mammal OR bird OR mammalian OR aves OR avian OR primate OR ape OR carnivora AND "animal cognition" OR "animal memory" OR "animal learning" OR "animal intelligence" OR "theory of mind in animals" OR "intelligence in animals" OR "cognition in animals" OR...	Google Scholar	343	42270	2022-09-11 21:35:55	1971	1975
mammal OR mammalia OR ape AND "animal cognition" OR "animal memory" OR "animal learning" OR "animal intelligence" OR "theory of mind in animals" OR "intelligence in animals" OR "cognition in animals" OR "animal innovation" OR "innovation in animals" OR...	Google Scholar	992	25620	2022-09-19 22:34:36	1973	2016
mammal OR mammalia OR carnivora AND "animal cognition" OR "animal memory" OR "animal learning" OR "animal intelligence" OR "theory of mind in animals" OR "intelligence in animals" OR "cognition in animals" OR "animal innovation" OR "innovation in anima...	Google Scholar	862	22962	2022-09-16 19:28:56	1973	2016
mammal OR bird OR mammalian OR aves OR avian OR primate OR ape OR carnivora AND "animal cognition" OR "animal memory" OR "animal learning" OR "animal intelligence" OR "theory of mind in animals" OR "intelligence in animals" OR "cognition in animals" OR...	Google Scholar	408	44100	2022-09-12 15:19:36	1987	1987
"primates cognition" OR "primates memory" OR "memory in primates" OR "learning in primates" OR "innovation in primates" OR "primates innovation" OR "problem solving in primates" from 2016 to 2020, no citations, no patents	Google Scholar	613	21896	2022-10-01 18:23:15	2016	2020
mammal OR bird OR mammalian OR aves OR avian OR primate OR ape OR carnivora AND "animal cognition" OR "animal memory" OR "animal learning" OR "animal intelligence" OR "theory of mind in animals" OR "intelligence in animals" OR "cognition in animals" OR...	Google Scholar	385	19879	2022-09-12 16:31:55	1988	1988
"dog cognition" OR "dog memory" OR "memory in dogs" OR "learning in dogs" OR "innovation in dogs" OR "dog innovation" OR "problem solving in dogs" from 1951 to 2000, no citations, no patents	Google Scholar	327	19924	2022-09-28 18:53:37	1953	2000
mammal OR mammalia OR lemur AND "animal cognition" OR "animal memory" OR "animal learning" OR "animal intelligence" OR "theory of mind in animals" OR "intelligence in animals" OR "cognition in animals" OR "animal innovation" OR "innovation in animals" ...	Google Scholar	978	27172	2022-09-22 19:22:37	2005	2017
"cat cognition" OR "cat memory" OR "memory in cats" OR "learning in cats" OR "innovation in cats" OR "cat innovation" OR "problem solving in cats" from 2000 to 2022, no citations, no patents	Google Scholar	451	18951	2022-09-28 14:57:20	2000	2022
mammal OR mammalia OR carnivora AND "animal cognition" OR "animal memory" OR "animal learning" OR "animal intelligence" OR "theory of mind in animals" OR "intelligence in animals" OR "cognition in animals" OR "animal innovation" OR "innovation in anima...	Google Scholar	891	25546	2022-09-16 21:14:25	2005	2017
"dog cognition" OR "dog memory" OR "memory in dogs" OR "learning in dogs" OR "innovation in dogs" OR "dog innovation" OR "problem solving in dogs" from 2011 to 2015, no citations, no patents	Google Scholar	474	27026	2022-09-28 22:44:55	2011	2015
aves OR bird OR birds OR avian AND "animal cognition" OR "animal memory" OR "animal learning" OR "animal intelligence" OR "theory of mind in animals" OR "intelligence in animals" OR "cognition in animals" OR "animal innovation" OR "innovation in animal...	Google Scholar	996	20339	2022-09-26 10:12:01	2019	2019
"corvid cognition" OR "corvid memory" OR "memory in corvids" OR "learning in corvids" OR "innovation in corvids" OR "corvid innovation" OR "problem solving in corvids" from 2001 to 2022, no citations, no patents	Google Scholar	380	14925	2022-09-29 13:31:06	2001	2022
mammal OR bird OR mammalian OR aves OR avian OR primate OR ape OR carnivora AND "animal cognition" OR "animal memory" OR "animal learning" OR "animal intelligence" OR "theory of mind in animals" OR "intelligence in animals" OR "cognition in animals" OR...	Scopus	170	9410	2022-09-10 20:00:21	1999	1999
mammal OR bird OR mammalian OR aves OR avian OR primate OR ape OR carnivora AND "animal cognition" OR "animal memory" OR "animal learning" OR "animal intelligence" OR "theory of mind in animals" OR "intelligence in animals" OR "cognition in animals" OR...	Scopus	158	13352	2022-09-10 19:50:29	1998	1998
mammal OR mammalia OR ape AND "animal cognition" OR "animal memory" OR "animal learning" OR "animal intelligence" OR "theory of mind in animals" OR "intelligence in animals" OR "cognition in animals" OR "animal innovation" OR "innovation in animals" OR...	Google Scholar	981	19556	2022-09-20 20:01:16	2019	2019
mammal OR bird OR mammalian OR aves OR avian OR primate OR ape OR carnivora AND "animal cognition" OR "animal memory" OR "animal learning" OR "animal intelligence" OR "theory of mind in animals" OR "intelligence in animals" OR "cognition in animals" OR...	Scopus	158	11226	2022-09-10 20:37:45	2003	2003
mammal OR mammalia OR ape AND "animal cognition" OR "animal memory" OR "animal learning" OR "animal intelligence" OR "theory of mind in animals" OR "intelligence in animals" OR "cognition in animals" OR "animal innovation" OR "innovation in animals" OR...	Google Scholar	986	23369	2022-09-20 12:09:45	2018	2018
mammal OR bird OR mammalian OR aves OR avian OR primate OR ape OR carnivora AND "animal cognition" OR "animal memory" OR "animal learning" OR "animal intelligence" OR "theory of mind in animals" OR "intelligence in animals" OR "cognition in animals" OR...	Scopus	137	10403	2022-09-10 18:59:55	1990	1991
mammal OR bird OR mammalian OR aves OR avian OR primate OR ape OR carnivora AND "animal cognition" OR "animal memory" OR "animal learning" OR "animal intelligence" OR "theory of mind in animals" OR "intelligence in animals" OR "cognition in animals" OR...	Scopus	151	9385	2022-09-10 20:08:50	2000	2000
mammal OR bird OR mammalian OR aves OR avian OR primate OR ape OR carnivora AND "animal cognition" OR "animal memory" OR "animal learning" OR "animal intelligence" OR "theory of mind in animals" OR "intelligence in animals" OR "cognition in animals" OR...	Scopus	183	10452	2022-09-10 19:10:24	1992	1993
"dog cognition" OR "dog memory" OR "memory in dogs" OR "learning in dogs" OR "innovation in dogs" OR "dog innovation" OR "problem solving in dogs" from 2016 to 2019, no citations, no patents	Google Scholar	637	11697	2022-09-29 09:04:10	2016	2019
mammal OR bird OR mammalian OR aves OR avian OR primate OR ape OR carnivora AND "animal cognition" OR "animal memory" OR "animal learning" OR "animal intelligence" OR "theory of mind in animals" OR "intelligence in animals" OR "cognition in animals" OR...	Scopus	172	11464	2022-09-10 18:49:14	1987	1989
mammal OR bird OR mammalian OR aves OR avian OR primate OR ape OR carnivora AND "animal cognition" OR "animal memory" OR "animal learning" OR "animal intelligence" OR "theory of mind in animals" OR "intelligence in animals" OR "cognition in animals" OR...	Scopus	138	16424	2022-09-10 19:34:44	1996	1996
aves OR bird OR birds OR avian AND "animal cognition" OR "animal memory" OR "animal learning" OR "animal intelligence" OR "theory of mind in animals" OR "intelligence in animals" OR "cognition in animals" OR "animal innovation" OR "innovation in animal...	Google Scholar	992	13496	2022-09-26 12:22:21	2020	2020
mammal OR bird OR mammalian OR aves OR avian OR primate OR ape OR carnivora AND "animal cognition" OR "animal memory" OR "animal learning" OR "animal intelligence" OR "theory of mind in animals" OR "intelligence in animals" OR "cognition in animals" OR...	Scopus	168	8966	2022-09-10 20:19:19	2001	2001
mammal OR mammalia OR lemur AND "animal cognition" OR "animal memory" OR "animal learning" OR "animal intelligence" OR "theory of mind in animals" OR "intelligence in animals" OR "cognition in animals" OR "animal innovation" OR "innovation in animals" ...	Google Scholar	937	13974	2022-09-22 21:32:12	2018	2018
mammal OR bird OR mammalian OR aves OR avian OR primate OR ape OR carnivora AND "animal cognition" OR "animal memory" OR "animal learning" OR "animal intelligence" OR "theory of mind in animals" OR "intelligence in animals" OR "cognition in animals" OR...	Scopus	163	9174	2022-09-10 20:29:13	2002	2002
mammal OR mammalia OR carnivora AND "animal cognition" OR "animal memory" OR "animal learning" OR "animal intelligence" OR "theory of mind in animals" OR "intelligence in animals" OR "cognition in animals" OR "animal innovation" OR "innovation in anima...	Google Scholar	860	13086	2022-09-17 10:14:48	2018	2018
mammal OR bird OR mammalian OR aves OR avian OR primate OR ape OR carnivora AND "animal cognition" OR "animal memory" OR "animal learning" OR "animal intelligence" OR "theory of mind in animals" OR "intelligence in animals" OR "cognition in animals" OR...	Scopus	107	6288	2022-09-10 19:27:22	1995	1995
mammal OR bird OR mammalian OR aves OR avian OR primate OR ape OR carnivora AND "animal cognition" OR "animal memory" OR "animal learning" OR "animal intelligence" OR "theory of mind in animals" OR "intelligence in animals" OR "cognition in animals" OR...	Scopus	127	7567	2022-09-10 19:42:04	1997	1997
mammal OR mammalia OR lemur AND "animal cognition" OR "animal memory" OR "animal learning" OR "animal intelligence" OR "theory of mind in animals" OR "intelligence in animals" OR "cognition in animals" OR "animal innovation" OR "innovation in animals" ...	Google Scholar	906	16195	2022-09-22 23:16:38	2019	2019
"bird cognition" OR "bird memory" OR "memory in birdss" OR "learning in birdss" OR "innovation in birdss" OR "bird innovation" OR "problem solving in birdss" from 1800 to 2000, no citations, no patents	Google Scholar	110	8850	2022-09-29 12:21:36	1830	2000
mammal OR bird OR mammalian OR aves OR avian OR primate OR ape OR carnivora AND "animal cognition" OR "animal memory" OR "animal learning" OR "animal intelligence" OR "theory of mind in animals" OR "intelligence in animals" OR "cognition in animals" OR...	Scopus	107	7791	2022-09-10 19:19:41	1994	1994
mammal OR mammalia OR carnivora AND "animal cognition" OR "animal memory" OR "animal learning" OR "animal intelligence" OR "theory of mind in animals" OR "intelligence in animals" OR "cognition in animals" OR "animal innovation" OR "innovation in anima...	Google Scholar	836	15246	2022-09-17 11:48:32	2019	2019
mammal OR bird OR mammalian OR aves OR avian OR primate OR ape OR carnivora AND "animal cognition" OR "animal memory" OR "animal learning" OR "animal intelligence" OR "theory of mind in animals" OR "intelligence in animals" OR "cognition in animals" OR...	Scopus	158	7114	2022-09-10 18:37:46	1984	1986
"bear cognition" OR "bear memory" OR "memory in bears" OR "learning in bears" OR "innovation in bears" OR "bear innovation" OR "problem solving in bears" from 2000 to 2022, no citations, no patents	Google Scholar	338	6410	2022-09-28 17:24:46	2000	2022
mammal OR bird OR mammalian OR aves OR avian OR primate OR ape OR carnivora AND "animal cognition" OR "animal memory" OR "animal learning" OR "animal intelligence" OR "theory of mind in animals" OR "intelligence in animals" OR "cognition in animals" OR...	Scopus	178	4631	2022-09-10 18:08:42	1976	1980
mammal OR bird OR mammalian OR aves OR avian OR primate OR ape OR carnivora AND "animal cognition" OR "animal memory" OR "animal learning" OR "animal intelligence" OR "theory of mind in animals" OR "intelligence in animals" OR "cognition in animals" OR...	Scopus	132	5677	2022-09-10 18:27:03	1981	1983
mammal OR mammalia OR ape AND "animal cognition" OR "animal memory" OR "animal learning" OR "animal intelligence" OR "theory of mind in animals" OR "intelligence in animals" OR "cognition in animals" OR "animal innovation" OR "innovation in animals" OR...	Google Scholar	980	21019	2022-09-21 00:03:13	2020	2020
"bird cognition" OR "bird memory" OR "memory in birdss" OR "learning in birdss" OR "innovation in birdss" OR "bird innovation" OR "problem solving in birdss" from 2001 to 2022, no citations, no patents	Google Scholar	196	6084	2022-09-29 12:42:43	2001	2022
mammal OR bird OR mammalian OR aves OR avian OR primate OR ape OR carnivora AND "animal cognition" OR "animal memory" OR "animal learning" OR "animal intelligence" OR "theory of mind in animals" OR "intelligence in animals" OR "cognition in animals" OR...	Scopus	140	4544	2022-09-10 17:59:13	1971	1975
mammal OR mammalia OR lemur AND "animal cognition" OR "animal memory" OR "animal learning" OR "animal intelligence" OR "theory of mind in animals" OR "intelligence in animals" OR "cognition in animals" OR "animal innovation" OR "innovation in animals" ...	Google Scholar	983	19212	2022-09-23 10:34:43	2020	2020
aves OR bird OR birds OR avian AND "animal cognition" OR "animal memory" OR "animal learning" OR "animal intelligence" OR "theory of mind in animals" OR "intelligence in animals" OR "cognition in animals" OR "animal innovation" OR "innovation in animal...	Google Scholar	975	8059	2022-09-26 14:07:24	2021	2021
mammal OR bird OR mammalian OR aves OR avian OR primate OR ape OR carnivora AND "animal cognition" OR "animal memory" OR "animal learning" OR "animal intelligence" OR "theory of mind in animals" OR "intelligence in animals" OR "cognition in animals" OR...	Google Scholar	234	9839	2022-09-10 21:07:53	1800	1900
mammal OR mammalia OR carnivora AND "animal cognition" OR "animal memory" OR "animal learning" OR "animal intelligence" OR "theory of mind in animals" OR "intelligence in animals" OR "cognition in animals" OR "animal innovation" OR "innovation in anima...	Google Scholar	915	18595	2022-09-17 14:44:47	2020	2020
mammal OR bird OR mammalian OR aves OR avian OR primate OR ape OR carnivora AND "animal cognition" OR "animal memory" OR "animal learning" OR "animal intelligence" OR "theory of mind in animals" OR "intelligence in animals" OR "cognition in animals" OR...	Scopus	125	3675	2022-09-10 17:36:17	1961	1965
mammal OR bird OR mammalian OR aves OR avian OR primate OR ape OR carnivora AND "animal cognition" OR "animal memory" OR "animal learning" OR "animal intelligence" OR "theory of mind in animals" OR "intelligence in animals" OR "cognition in animals" OR...	Scopus	128	3292	2022-09-10 17:51:14	1966	1970
"seal cognition" OR "seal memory" OR "seal in pinnipeds" OR "learning in seals" OR "innovation in seals" OR "seal innovation" OR "problem solving in seals" from 1800 to 2022, no citations, no patents	Google Scholar	209	8524	2022-09-29 17:21:28	1930	2022
mammal OR mammalia OR ape AND "animal cognition" OR "animal memory" OR "animal learning" OR "animal intelligence" OR "theory of mind in animals" OR "intelligence in animals" OR "cognition in animals" OR "animal innovation" OR "innovation in animals" OR...	Google Scholar	953	26568	2022-09-21 11:15:21	2021	2021
mammal OR mammalia OR carnivora AND "animal cognition" OR "animal memory" OR "animal learning" OR "animal intelligence" OR "theory of mind in animals" OR "intelligence in animals" OR "cognition in animals" OR "animal innovation" OR "innovation in anima...	Google Scholar	977	7910	2022-09-17 17:03:20	2021	2021
"pinniped cognition" OR "pinniped memory" OR "memory in pinnipeds" OR "learning in pinnipeds" OR "innovation in pinnipeds" OR "pinniped innovation" OR "problem solving in pinnipeds" from 1800 to 2022, no citations, no patents	Google Scholar	86	1350	2022-09-29 16:56:19	1990	2022
mammal OR mammalia OR lemur AND "animal cognition" OR "animal memory" OR "animal learning" OR "animal intelligence" OR "theory of mind in animals" OR "intelligence in animals" OR "cognition in animals" OR "animal innovation" OR "innovation in animals" ...	Google Scholar	972	6939	2022-09-24 11:04:14	2021	2022
"passerine cognition" OR "passerine memory" OR "memory in passerines" OR "learning in passerines" OR "innovation in passerines" OR "passerine innovation" OR "problem solving in passerines" from 1800 to 2022, no citations, no patents	Google Scholar	52	2099	2022-09-29 13:41:59	1978	2022
"dog cognition" OR "dog memory" OR "memory in dogs" OR "learning in dogs" OR "innovation in dogs" OR "dog innovation" OR "problem solving in dogs" from 2020 to 2022, no citations, no patents	Google Scholar	493	1959	2022-09-29 09:59:05	2020	2022
mammal OR bird OR mammalian OR aves OR avian OR primate OR ape OR carnivora AND "animal cognition" OR "animal memory" OR "animal learning" OR "animal intelligence" OR "theory of mind in animals" OR "intelligence in animals" OR "cognition in animals" OR...	Scopus	20	4984	2022-09-10 20:42:41	2006	2006
"bear cognition" OR "bear memory" OR "memory in bears" OR "learning in bears" OR "innovation in bears" OR "bear innovation" OR "problem solving in bears" from 1800 to 2000, no citations, no patents	Google Scholar	57	2116	2022-09-28 16:49:57	1824	2000
"wolf cognition" OR "wolf memory" OR "memory in wolves" OR "learning in wolves" OR "innovation in wolves" OR "wolf innovation" OR "problem solving in wolves" from 2001 to 2022, no citations, no patents	Google Scholar	98	1152	2022-09-29 10:55:09	2001	2022
"canid cognition" OR "canid memory" OR "memory in canids" OR "learning in canids" OR "innovation in canids" OR "canid innovation" OR "problem solving in canids" from 2001 to 2022, no citations, no patents	Google Scholar	41	1535	2022-09-29 11:02:16	2002	2022
aves OR bird OR birds OR avian AND "animal cognition" OR "animal memory" OR "animal learning" OR "animal intelligence" OR "theory of mind in animals" OR "intelligence in animals" OR "cognition in animals" OR "animal innovation" OR "innovation in animal...	Google Scholar	981	1226	2022-09-26 17:37:19	2021	2022
mammal OR bird OR mammalian OR aves OR avian OR primate OR ape OR carnivora AND "animal cognition" OR "animal memory" OR "animal learning" OR "animal intelligence" OR "theory of mind in animals" OR "intelligence in animals" OR "cognition in animals" OR...	Scopus	42	1141	2022-09-10 17:26:28	1951	1960
"primates cognition" OR "primates memory" OR "memory in primates" OR "learning in primates" OR "innovation in primates" OR "primates innovation" OR "problem solving in primates" from 2021 to 2022, no citations, no patents	Google Scholar	218	710	2022-10-01 20:21:36	2021	2022
"dog cognition" OR "dog memory" OR "memory in dogs" OR "learning in dogs" OR "innovation in dogs" OR "dog innovation" OR "problem solving in dogs" from 1901 to 1950, no citations, no patents	Google Scholar	30	411	2022-09-28 18:19:59	1903	1950
"wolf cognition" OR "wolf memory" OR "memory in wolves" OR "learning in wolves" OR "innovation in wolves" OR "wolf innovation" OR "problem solving in wolves" from 1800 to 2000, no citations, no patents	Google Scholar	20	1443	2022-09-29 10:44:31	1951	1999
mammal OR mammalia OR carnivora AND "animal cognition" OR "animal memory" OR "animal learning" OR "animal intelligence" OR "theory of mind in animals" OR "intelligence in animals" OR "cognition in animals" OR "animal innovation" OR "innovation in anima...	Google Scholar	723	1784	2022-09-18 10:01:02	2022	2022
"corvid cognition" OR "corvid memory" OR "memory in corvids" OR "learning in corvids" OR "innovation in corvids" OR "corvid innovation" OR "problem solving in corvids" from 1800 to 2000, no citations, no patents	Google Scholar	11	839	2022-09-29 12:52:05	1990	1999
mammal OR bird OR mammalian OR aves OR avian OR primate OR ape OR carnivora AND "animal cognition" OR "animal memory" OR "animal learning" OR "animal intelligence" OR "theory of mind in animals" OR "intelligence in animals" OR "cognition in animals" OR...	Scopus	20	976	2022-09-10 17:20:28	1910	1950
"cat cognition" OR "cat memory" OR "memory in cats" OR "learning in cats" OR "innovation in cats" OR "cat innovation" OR "problem solving in cats" from 1800 to 1949, no citations, no patents	Google Scholar	7	522	2022-09-28 16:14:45	1882	1946
"dog cognition" OR "dog memory" OR "memory in dogs" OR "learning in dogs" OR "innovation in dogs" OR "dog innovation" OR "problem solving in dogs" from 1800 to 1900, no citations, no patents	Google Scholar	9	56	2022-09-28 18:16:41	1860	1895
"canid cognition" OR "canid memory" OR "memory in canids" OR "learning in canids" OR "innovation in canids" OR "canid innovation" OR "problem solving in canids" from 1800 to 2000, no citations, no patents	Google Scholar	1	175	2022-09-29 10:56:58	1999	1999
mammal OR bird OR mammalian OR aves OR avian OR primate OR ape OR carnivora AND "animal cognition" OR "animal memory" OR "animal learning" OR "animal intelligence" OR "theory of mind in animals" OR "intelligence in animals" OR "cognition in animals" OR...	Scopus	1	0	2022-09-10 17:17:55	1879	1879
mammal OR bird OR mammalian OR aves OR avian OR primate OR ape OR carnivora AND "animal cognition" OR "animal memory" OR "animal learning" OR "animal intelligence" OR "theory of mind in animals" OR "intelligence in animals" OR "cognition in animals" OR...	PubMed	0	0	2022-09-12 14:04:22	0	0
mammal OR bird OR mammalian OR aves OR avian OR primate OR ape OR carnivora AND "animal cognition" OR "animal memory" OR "animal learning" OR "animal intelligence" OR "theory of mind in animals" OR "intelligence in animals" OR "cognition in animals" OR...	PubMed	0	0	2022-09-12 14:05:55	0	0
mammal OR bird OR mammalian OR aves OR avian OR primate OR ape OR carnivora AND "animal cognition" OR "animal memory" OR "animal learning" OR "animal intelligence" OR "theory of mind in animals" OR "intelligence in animals" OR "cognition in animals" OR...	PubMed	198	0	2022-09-12 14:08:24	1998	2000
mammal OR bird OR mammalian OR aves OR avian OR primate OR ape OR carnivora AND "animal cognition" OR "animal memory" OR "animal learning" OR "animal intelligence" OR "theory of mind in animals" OR "intelligence in animals" OR "cognition in animals" OR...	PubMed	190	0	2022-09-12 14:15:43	2010	2012
mammal OR bird OR mammalian OR aves OR avian OR primate OR ape OR carnivora AND "animal cognition" OR "animal memory" OR "animal learning" OR "animal intelligence" OR "theory of mind in animals" OR "intelligence in animals" OR "cognition in animals" OR...	PubMed	199	0	2022-09-12 14:18:52	2020	2022
mammal OR bird OR mammalian OR aves OR avian OR primate OR ape OR carnivora AND "animal cognition" OR "animal memory" OR "animal learning" OR "animal intelligence" OR "theory of mind in animals" OR "intelligence in animals" OR "cognition in animals" OR...	PubMed	739	0	2022-09-12 14:30:39	2020	2022
mammal OR bird OR mammalian OR aves OR avian OR primate OR ape OR carnivora AND "animal cognition" OR "animal memory" OR "animal learning" OR "animal intelligence" OR "theory of mind in animals" OR "intelligence in animals" OR "cognition in animals" OR...	PubMed	464	0	2022-09-12 14:36:08	2021	2022
